# Supplementary material
Source: PubMed Central journal article supplement (PMC3063596)
Supplement: 1001501107_pnas.201001501SI.pdf [file 1001501107_pnas.201001501SI.pdf]

# Supporting Information

An et al. 10.1073/pnas.1001501107

## SI Materials and Methods

**Recipes for the Rich Medium and the Minimal Medium.** *Rich medium (per liter).* Twenty grams proteose peptone, 5 g yeast extract, 5 g NaCl, 5 g glucose, 5 g  $K_2HPO_4$ , 0.5 g L-cysteine, 5 mg hemi, and 2.5  $\mu$ L vitamin  $K_1$ .

*Minimal medium (per liter).* One gram  $(NH_4)_2SO_4$ , 1 g  $Na_2CO_3$ , 5 g glucose, 0.5 g L-cysteine, 5 mg hemin, 2.5  $\mu$ L vitamin  $K_1$ , 2 mg  $FeSO_4 \cdot 7H_2O$ , 5  $\mu$ g vitamin  $B_{12}$ , and 20 mL mineral solution (per liter: 18 g  $KH_2PO_4$ , 18 g NaCl, 530 mg  $CaCl_2 \cdot 2H_2O$ , 400 mg  $MgCl_2 \cdot 6H_2O$ , 200 mg  $MnCl_2 \cdot 4H_2O$ , and 20 mg  $CoCl_2 \cdot 6H_2O$ ).

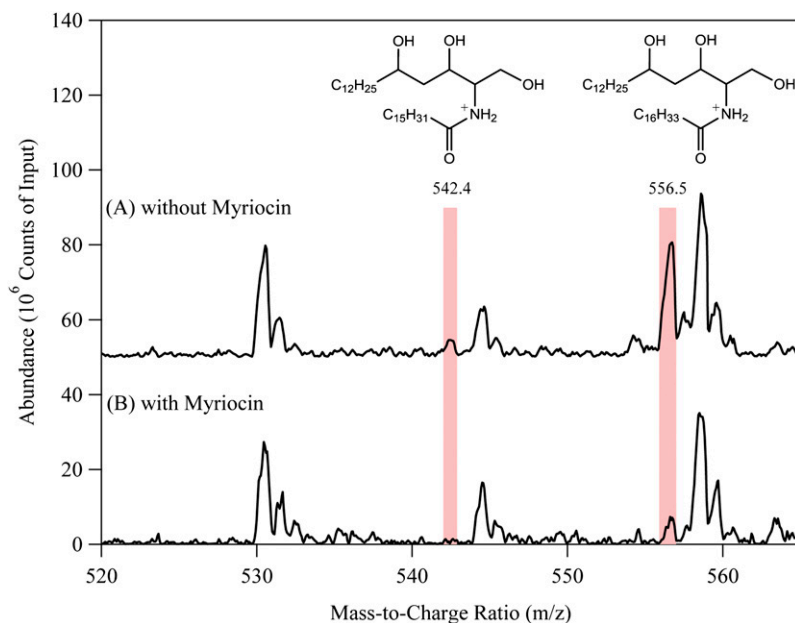

**Fig. S1.** Myriocin-treated *B. fragilis* cells have diminished sphingolipid production. Electrospray ionization mass spectra (ESI/MS) of lipids extracted from wild-type *B. fragilis* cells that were grown (A) without or (B) with added myriocin. In presence of myriocin, the relative abundances of the molecules represented by the two peaks at  $m/z$  542.4 and 556.5 in ESI/MS are greatly reduced. The reduction of the peak area is calculated to be 77% and 68%, respectively. Further analyses of these two peaks by tandem mass spectra (Figs. S2 and S3) show that they stand for ceramide-like structures (phytoceramide). ESI/MS was performed with three separate 5- $\mu$ L injections of samples into the ionization chamber of a mass spectrometer (Thermo Finnigan TSQ 7000). The ESI/MS is a triple quadrupole mass spectrometer, operating under positive ionization mode.

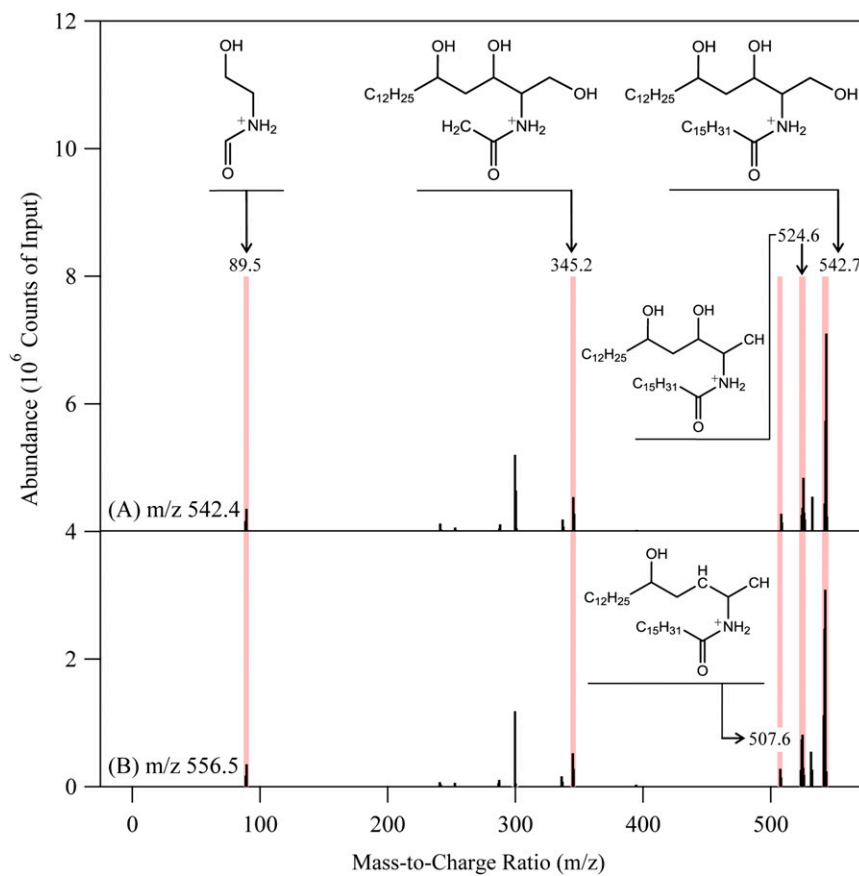

**Fig. S2.** Tandem mass spectra of the peaks at (A)  $m/z = 542.4$  and (B)  $m/z = 556.5$  acquired at 15 eV. Only one structure is proposed for each ion fragment. Isomeric structures are not shown.

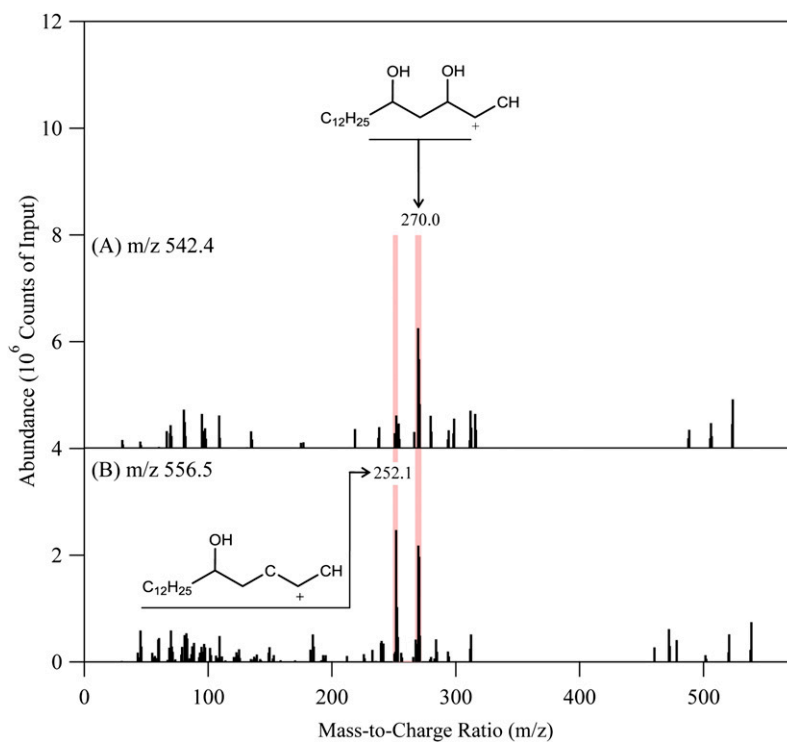

**Fig. S3.** Tandem mass spectra of the peaks at (A)  $m/z = 542.4$  and (B)  $m/z = 556.5$  acquired at 35 eV and 40 eV, respectively. Only one structure is proposed for each ion fragment. Isomeric structures are not shown.

**Table S1. Conservation of serine palmitoyl transferase orthologs in *Bacteroides* and related genera**

| Organisms                                                                         | Score | E value |
|-----------------------------------------------------------------------------------|-------|---------|
| <i>Porphyromonas gingivalis</i> W83 [CFB group bacteria] taxid 242619             | 192   | 5E-47   |
| <i>Porphyromonas gingivalis</i> ATCC 33277 [CFB group bacteria] taxid 431947      | 191   | 7E-47   |
| <i>Porphyromonas endodontalis</i> ATCC 35406 [CFB group bacteria] taxid 553175    | 189   | 2E-46   |
| <i>Parabacteroides merdae</i> ATCC 43184 [CFB group bacteria] taxid 411477        | 187   | 1E-45   |
| <i>Bacteroides caccae</i> ATCC 43185 [CFB group bacteria] taxid 411901            | 187   | 1E-45   |
| <i>Bacteroides finegoldii</i> DSM 17565 [CFB group bacteria] taxid 483215         | 187   | 1E-45   |
| <i>Parabacteroides johnsonii</i> DSM 18315 [CFB group bacteria] taxid 537006      | 187   | 2E-45   |
| <i>Bacteroides ovatus</i> ATCC 8483 [CFB group bacteria] taxid 411476             | 187   | 2E-45   |
| <i>Bacteroides</i> sp. D2 [CFB group bacteria] taxid 556259                       | 186   | 2E-45   |
| <i>Prevotella veroralis</i> F0319 [CFB group bacteria] taxid 649761               | 186   | 3E-45   |
| <i>Bacteroides</i> sp. D1 [CFB group bacteria] taxid 556258                       | 186   | 4E-45   |
| <i>Bacteroides</i> sp. 2_1_22 [CFB group bacteria] taxid 469588                   | 186   | 4E-45   |
| <i>Bacteroides</i> sp. 2_2_4 [CFB group bacteria] taxid 469590                    | 186   | 4E-45   |
| <i>Bacteroides</i> sp. 2_1_7 [CFB group bacteria] taxid 457388                    | 181   | 6E-44   |
| <i>Parabacteroides distasonis</i> ATCC 8503 [CFB group bacteria] taxid 435591     | 181   | 6E-44   |
| <i>Parabacteroides</i> sp. D13 [CFB group bacteria] taxid 563193                  | 181   | 6E-44   |
| <i>Bacteroides</i> sp. 2_1_33B [CFB group bacteria] taxid 469589                  | 181   | 6E-44   |
| <i>Bacteroides fragilis</i> NCTC 9343 [CFB group bacteria] taxid 272559           | 179   | 4E-43   |
| <i>Bacteroides</i> sp. 3_2_5 [CFB group bacteria] taxid 457392                    | 179   | 4E-43   |
| <i>Bacteroides</i> sp. 2_1_16 [CFB group bacteria] taxid 469587                   | 179   | 4E-43   |
| <i>Bacteroides fragilis</i> YCH46 [CFB group bacteria] taxid 295405               | 179   | 4E-43   |
| <i>Prevotella bivia</i> JCVIHMPO10 [CFB group bacteria] taxid 553171              | 177   | 1E-42   |
| <i>Prevotella bergensis</i> DSM 17361 [CFB group bacteria] taxid 585502           | 177   | 1E-42   |
| <i>Bacteroides fragilis</i> 3_1_12 [CFB group bacteria] taxid 457424              | 176   | 3E-42   |
| <i>Bacteroides eggerthii</i> DSM 20697 [CFB group bacteria] taxid 483216          | 175   | 4E-42   |
| <i>Bacteroides stercoris</i> ATCC 43183 [CFB group bacteria] taxid 449673         | 175   | 6E-42   |
| <i>Sphingobacterium spiritivorum</i> ATCC 33300 [CFB group bacteria] taxid 525372 | 173   | 2E-41   |
| <i>Sphingobacterium spiritivorum</i> ATCC 33861 [CFB group bacteria] taxid 525373 | 173   | 2E-41   |
| <i>Sphingobacterium spiritivorum</i> [CFB group bacteria] taxid 258               | 173   | 2E-41   |
| <i>Bacteroides uniformis</i> ATCC 8492 [CFB group bacteria] taxid 411479          | 172   | 3E-41   |
| <i>Prevotella tanneriae</i> ATCC 51259 [CFB group bacteria] taxid 626522          | 172   | 4E-41   |
| <i>Prevotella melaninogenica</i> ATCC 25845 [CFB group bacteria] taxid 553174     | 172   | 5E-41   |
| <i>Pedobacter heparinus</i> DSM 2366 [CFB group bacteria] taxid 485917            | 172   | 6E-41   |
| <i>Pedobacter</i> sp. BAL39 [CFB group bacteria] taxid 391596                     | 171   | 1E-40   |
| <i>Bacteroides</i> sp. D20 [CFB group bacteria] taxid 585543                      | 171   | 1E-40   |
| <i>Chitinophaga pinensis</i> DSM 2588 [CFB group bacteria] taxid 485918           | 169   | 2E-40   |
| <i>Bacteroides thetaiotaomicron</i> VPI-5482 [CFB group bacteria] taxid 226186    | 168   | 6E-40   |
| <i>Bacteroides</i> sp. 1_1_6 [CFB group bacteria] taxid 469586                    | 168   | 6E-40   |
| <i>Bacteroides coprocola</i> DSM 17136 [CFB group bacteria] taxid 470145          | 168   | 8E-40   |
| <i>Bacteroides intestinalis</i> DSM 17393 [CFB group bacteria] taxid 471870       | 167   | 8E-40   |
| <i>Bacteroides cellulosilyticus</i> DSM 14838 [CFB group bacteria] taxid 537012   | 167   | 8E-40   |
| <i>Prevotella copri</i> DSM 18205 [CFB group bacteria] taxid 537011               | 167   | 9E-40   |
| <i>Bacteroides dorei</i> DSM 17855 [CFB group bacteria] taxid 483217              | 167   | 1E-39   |
| <i>Bacteroides</i> sp. 9_1_42FAA [CFB group bacteria] taxid 457395                | 167   | 1E-39   |
| <i>Bacteroides dorei</i> 5_1_36/D4 [CFB group bacteria] taxid 556260              | 167   | 1E-39   |
| <i>Bacteroides</i> sp. 3_1_33FAA [CFB group bacteria] taxid 457391                | 167   | 1E-39   |
| <i>Bacteroides vulgatus</i> ATCC 8482 [CFB group bacteria] taxid 435590           | 167   | 1E-39   |
| <i>Bacteroides</i> sp. 4_3_47FAA [CFB group bacteria] taxid 457394                | 167   | 1E-39   |

Homology is compared with human serine palmitoyl transferase enzyme subunit SPTLC1 by BLASTP (2.2.22+) standard search. CFB, *Cytophaga-Flavobacteria-Bacteroides*.
